# Supplementary material for: Exploring the role of a single water molecule in the tropospheric reaction of glycolaldehyde with an OH radical: a mechanistic and kinetics study
Source: Royal Society of Chemistry journal article supplement (doi:10.1039/c6ra01299j), 2016-01-01
Supplement: c6ra01299j1.pdf [file c6ra01299j1.pdf]

## Supporting Information

# Exploring the role of single water molecule in the tropospheric reaction of Glycoaldehyde with OH radical: A mechanistic and kinetic study

Ramanpreet Kaur and Vikas\*

Quantum Chemistry Group, Department of Chemistry & Centre of Advanced Studies in Chemistry, Panjab University, Chandigarh- 160014, INDIA.

### Table of Contents

| Contents                                                                                                                                                                                                                                                                                                                                                                                                                                                                                                                                                                                                                                                                                                                                                                     | Page Nos. |
|------------------------------------------------------------------------------------------------------------------------------------------------------------------------------------------------------------------------------------------------------------------------------------------------------------------------------------------------------------------------------------------------------------------------------------------------------------------------------------------------------------------------------------------------------------------------------------------------------------------------------------------------------------------------------------------------------------------------------------------------------------------------------|-----------|
| <b>Figure S1.</b> Structure of pre-reaction complex PRC11 located by GRRM search for the PRCs in the absence of a single-water molecule at the BHandHLYP/6-31G level of the theory.                                                                                                                                                                                                                                                                                                                                                                                                                                                                                                                                                                                          | 3         |
| <b>Table S1.</b> Relative energies (in kcal/mol) of stationary points, relative to the energy of isolated reactants R1& R2 (i.e. <i>trans</i> - & <i>cis</i> -isomer without water) <sup>a</sup> and R3 (including a single-water molecule) <sup>a</sup> along various pathways depicted in Figures 2-6, at the ZPE corrected M06-2X/6-311++G(d,p), BHandHLYP/6-311++G(d,p) and CCSD(T)/6-311++G(d,p)//BHandHLYP/6-311++G(d,p) levels of the theory. The BSSE corrected and ZPE scaled energies are also compared. The transition state represented as TS <sub>n</sub> connects the pre-reaction complex PRC <sub>n</sub> to the product complex PC <sub>n</sub> . The values in square brackets are at ROCCSD(T)/6311++G(d,p)//BHandHLYP/6-311++G(d,p) level of the theory. | 4         |
| <b>Table S2.</b> Relative zero-point energy (ZPE) (in kcal/mol) of stationary points, relative to the ZPE of isolated reactants R1& R2 (i.e. <i>trans</i> - & <i>cis</i> -isomer without water) <sup>a</sup> and R3 (including a single-water molecule) <sup>a</sup> along various pathways depicted in Figures 2-6 (of the article), at the BHandHLYP/6-311++G(d,p) and M06-2X/6-311++G(d,p) levels of the theory, and relative energy at the BHandHLYP/6-31G levels of the theory. The <S <sup>2</sup> > values for open-shell systems are also given at the BHandHLYP/6-31G, BHandHLYP/6-311++G(d,p) and CCSD(T)/6311++G(d,p)//BHandHLYP/6-311++G(d,p) levels of theory.                                                                                                  | 5         |
| <b>Table S3.</b> Gibbs free-energy change ( $\Delta G$ ), in kcal/mol, along various pathways depicted in Figures 2–6 (of the article) at the DFT/BHandHLYP/6-311++G(d,p) level of the theory. The $\Delta G$ between the pre-reactant complexes (PRCs) and the transition states (TSs) represents free-energy of activation: $\Delta E_A = G_{TS} - G_{PRC}$ . The values in parentheses correspond to net Gibbs free-energy change along the respective pathway.                                                                                                                                                                                                                                                                                                           | 6-7       |

|                                                                                                                                                                                                                                                                                                                                                                                                                                                          |      |
|----------------------------------------------------------------------------------------------------------------------------------------------------------------------------------------------------------------------------------------------------------------------------------------------------------------------------------------------------------------------------------------------------------------------------------------------------------|------|
| <b>Table S4.</b> Spin density distribution, in the atomic units of electronic charge ( $e$ ), determined from NBO analysis at each atomic centre of pre-reaction complexes and transition states involved in the hydrogen abstraction reaction of Glycoaldehyde with OH, in the presence and absence of a single-water molecule, at the BHandHLYP/6-311++G(d,p) level of theory.                                                                         | 8    |
| <b>Figure S2.</b> Addition pathways for the reaction of Glycolaldehyde with OH radical in the absence of water (Path 12-15).                                                                                                                                                                                                                                                                                                                             | 9-10 |
| <b>Figure S3.</b> A schematic mechanism for the formation of species of type PRC12 or PRC13 by the reaction of Glycolaldehyde with hydroxyl radical via the oxy radical intermediate species.                                                                                                                                                                                                                                                            | 10   |
| <b>Table S5:</b> Calculated rate constants (in $\text{cm}^3 \text{ molecule}^{-1} \text{ s}^{-1}$ ), without taking tunneling corrections into account, for water-free pathway 2, in the temperature range 200K-500K at CCSD(T)/6-311++G(d,p)//BHandHLYP/6-311++G(d,p) level of the theory and comparison with $k_{\text{lit}}$ reported in Ref. 12.                                                                                                     | 11   |
| <b>Table S6:</b> Calculated rate constant (in $\text{cm}^3 \text{ molecule}^{-1} \text{ s}^{-1}$ ), without taking tunneling corrections into account for water-free pathway 5, in the temperature range 200K-500K, at CCSD(T)/6-311++G(d,p)//BHandHLYP/6-311++G(d,p) level of the theory, and comparison with $k_{\text{lit}}$ reported in Ref. 12.                                                                                                     | 11   |
| <b>Table S7.</b> Enthalpy ( $\Delta H$ ) and entropy change ( $\Delta S$ ) in terms of $\Delta H$ and $-T\Delta S$ respectively, in kcal/mol, at temperature 298K, at the BHandHLYP/6-311++G(d,p) level of the theory for various pathways obtained.                                                                                                                                                                                                     | 12   |
| <b>Table S8.</b> Effect of basis set in the CCSD(T) calculations, employing cc-pVTZ and 6-311G(d,p) basis sets, for the relative energy of species explored along path 2, w.r.t the isolated reactants R1.                                                                                                                                                                                                                                               | 12   |
| <b>Table S9.</b> Rate constants (in $\text{cm}^3 \text{ molecule}^{-1} \text{ s}^{-1}$ ) of water-free pathways for hydrogen abstraction in Glycolaldehyde with hydroxyl radical, in the temperature range 200-500K, at the CCSD(T)/6-311++G(d,p)//BHandHLYP/6-311++G(d,p) (BSSE uncorrected) level of the theory. The subscript on the rate constant $k$ depicts the respective pathway depicted in main text Figures 2, 3 and 6 (of the main article). | 13   |
| <b>Table S10.</b> Rate constants (in $\text{cm}^3 \text{ molecule}^{-1} \text{ s}^{-1}$ ) of water-assisted pathways for the hydrogen abstraction in Glycolaldehyde with hydroxyl radical, in the temperature range 240-500K, at the CCSD(T)/6-311++G(d,p)//BHandHLYP/6-311++G(d,p) (BSSE uncorrected) level of the theory. The subscript on the rate constant $k$ depicts the respective pathway depicted in Figures 4-6 (of the main article).         | 14   |
| <b>Table S11.</b> Comparison of rate constants (in $\text{cm}^3 \text{ molecule}^{-1} \text{ s}^{-1}$ ), without tunneling correction, of the water-free and water-assisted pathways for the hydrogen abstraction in Glycolaldehyde with hydroxyl radical, at 298K, at the BHandHLYP/6-311++G(d,p), M06-2X/6-311++G(d,p) and CCSD(T)/6-311++G(d,p)//BHandHLYP/6-311++G(d,p) (BSSE                                                                        | 15   |

---

uncorrected) levels of the theory.

**Table S12.** Relative energies and ZPE (in kcal/mol) of the stationary points obtained for the addition of hydroxyl radical to glycolaldehyde depicted in Figure S2 at the BHandHLYP/6-311++G(d,p) level of theory. The values are relative to the isolated reactants R1 depicted in Figure S2.

15

**Optimized Cartesian Coordinates (X,Y,Z)**, in angstroms, for the pre-reactant complexes (PRCs) at BHandHLYP/6-311++G(d,p) level of the theory .

---

16-18

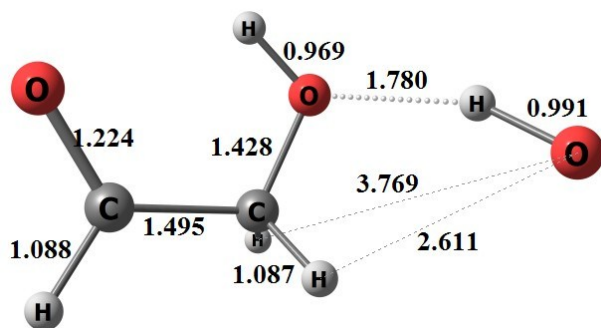

**Figure S1.** Structure of pre-reaction complex PRC11 located by GRRM search for the PRCs in the absence of a single-water molecule at the BHandHLYP/6-31G level of the theory.

---

**Table S1.** Relative energies (in kcal/mol) of stationary points, relative to the energy of isolated reactants R1& R2 (i.e. *trans*- & *cis*-isomer without water)<sup>a</sup> and R3 (including a single-water molecule)<sup>a</sup> along various pathways depicted in Figures 2-6, at the ZPE corrected M06-2X/6-311++G(d,p), BHandHLYP/6-311++G(d,p) and CCSD(T)/6-311++G(d,p)//BHandHLYP/6-311++G(d,p) levels of the theory. The BSSE corrected and ZPE scaled energies are also compared. The transition state represented as TS<sub>n</sub> connects the pre-reaction complex PRC<sub>n</sub> to the product complex PC<sub>n</sub>. The values in square brackets are at ROCCSD(T)/6311++G(d,p)//BHandHLYP/6-311++G(d,p) level of the theory.

| Species          | M06-2X<br>/6-311++G<br>(d,p) | BHandHLYP/<br>6-311++G(d,p)<br>+ZPE (ZPE) | CCSD(T)/6311++G(d,p)//<br>BHandHLYP/<br>6-311++G(d,p)+ZPE | CCSD(T)/6311++G(d,p)//<br>BHandHLYP/<br>6-311++G(d,p)+ZPE<br>+(BSSE) <sup>b</sup> | CCSD(T)/6-311++G(d,p)//<br>BHandHLYP/<br>6-311++G(d,p)+<br>(ZPE x 0.9540) <sup>d</sup> |
|------------------|------------------------------|-------------------------------------------|-----------------------------------------------------------|-----------------------------------------------------------------------------------|----------------------------------------------------------------------------------------|
| PRC1             | -4.58                        | -3.45                                     | -3.26                                                     | -1.84(1.42)                                                                       | -3.33 (1.50)                                                                           |
| PRC2             | -4.39                        | -3.07                                     | -2.32                                                     | -0.68 (1.64)                                                                      | -2.37 (1.14)                                                                           |
| PRC3             | -8.09                        | -5.02                                     | -4.08                                                     | -2.57 (1.51)                                                                      | -4.18 (1.79)                                                                           |
| PRC4             | -4.39                        | -3.89                                     | -3.33                                                     | -1.95 (1.38)                                                                      | -3.41 (1.80)                                                                           |
| PRC5             | -5.40                        | -4.39                                     | -1.00                                                     | 0.87(1.87)                                                                        | -1.10 (1.85)                                                                           |
| TS1              | -2.89                        | 0.06                                      | -2.51                                                     | 2.33 (4.84)                                                                       | -2.45(-1.02)                                                                           |
| TS2              | -3.45                        | 0.00                                      | -2.45                                                     | 2.30 (4.75)                                                                       | -2.45 (0.19)                                                                           |
| TS3              | -0.56                        | 2.07                                      | -0.19                                                     | 4.64 (4.83)                                                                       | -0.14 (-1.15)                                                                          |
| TS4              | -0.56                        | 3.39                                      | 0.38                                                      | 5.52 (5.15)                                                                       | 0.44 (-1.19)                                                                           |
| TS5              | 0.69                         | 7.09                                      | 5.02                                                      | 11.95 (6.93)                                                                      | 5.09(-1.63)                                                                            |
| PC1              | -31.94                       | -25.10                                    | -30.12                                                    | -28.28 (1.84)                                                                     | -30.22 (2.27)                                                                          |
| PC2              | -35.89                       | -28.74                                    | -33.63                                                    | -31.51 (2.12)                                                                     | -33.74 (2.34)                                                                          |
| PC3              | -42.48                       | -36.77                                    | -37.71 [23.26]                                            | -36.52 (1.19)                                                                     | -37.83 (2.26)                                                                          |
| PC4              | -41.85                       | -36.27                                    | -36.21 [24.66]                                            | -34.76 (1.44)                                                                     | -36.32 (2.52)                                                                          |
| PC5              | -13.05                       | -11.23                                    | -11.99                                                    | -10.13 (1.86)                                                                     | -12.02 (0.59)                                                                          |
| BC6              | -2.20                        | -1.63                                     | -1.88                                                     | -0.38 (1.50)                                                                      | -1.98 (1.47)                                                                           |
| BC7              | -4.58                        | -2.76                                     | -3.95                                                     | -1.58 (2.37)                                                                      | -4.09 (2.25)                                                                           |
| BC8              | -5.15                        | -4.14                                     | -4.71                                                     | -2.78 (1.93)                                                                      | -4.83 (1.95)                                                                           |
| BC9              | -3.01                        | -3.20                                     | -3.51                                                     | -1.45 (2.06)                                                                      | -3.60 (1.29)                                                                           |
| BC10             | -2.95                        | -2.26                                     | -2.38                                                     | -0.92 (1.46)                                                                      | -2.48 (1.41)                                                                           |
| PRC6             | -13.49                       | -11.42                                    | -11.30                                                    | -6.67 (4.63)                                                                      | -11.53 (4.41)                                                                          |
| PRC7             | -14.06                       | -11.23                                    | -11.04                                                    | -6.75 (4.29)                                                                      | -11.27 (4.17)                                                                          |
| PRC8             | -13.55                       | -12.05                                    | -10.73                                                    | -6.35 (4.38)                                                                      | -10.96 (4.17)                                                                          |
| PRC9             | -11.30                       | -9.98                                     | -9.66                                                     | -5.56 (4.10)                                                                      | -9.87 (3.81)                                                                           |
| PRC10            | -10.92                       | -9.85                                     | -8.09                                                     | -4.32 (3.77)                                                                      | -8.29 (3.57)                                                                           |
| TS6 <sup>c</sup> | -5.84                        | 1.82                                      | -                                                         | -                                                                                 | -                                                                                      |
| TS7              | -9.60                        | -5.46                                     | -7.40                                                     | -0.39 (7.01)                                                                      | -7.56 (2.67)                                                                           |
| TS8              | -7.72                        | -1.32                                     | -6.21                                                     | 1.16 (7.37)                                                                       | -6.31 (1.41)                                                                           |
| TS9              | -7.03                        | -3.58                                     | -4.13                                                     | 3.83 (7.96)                                                                       | -4.25 (1.77)                                                                           |
| TS10             | -7.97                        | -3.45                                     | -4.77 [-4.89]                                             | 3.72 (8.49)                                                                       | -4.84 (0.93)                                                                           |
| PC6              | -24.10                       | -21.90                                    | -21.84                                                    | -17.31 (4.53)                                                                     | -22.02 (3.33)                                                                          |
| PC7              | -41.60                       | -33.70                                    | -37.78                                                    | -33.97(4.81)                                                                      | -39.02 (4.53)                                                                          |
| PC8              | -38.28                       | -32.07                                    | -37.15                                                    | -26.01(11.14)                                                                     | -37.39 (4.59)                                                                          |
| PC9              | -48.95                       | -43.30                                    | -43.49 [29.62]                                            | -39.59 (3.90)                                                                     | -43.70 (3.99)                                                                          |
| PC10             | -51.02                       | -43.05                                    | -44.11 [28.99]                                            | -39.58 (4.53)                                                                     | -44.37 (4.83)                                                                          |
| P1               | -26.73                       | -21.65                                    | -25.98                                                    | -25.98                                                                            | -25.99 (0.43)                                                                          |
| P2               | -38.84                       | -33.89                                    | -34.51                                                    | -34.51                                                                            | -34.57 (0.89)                                                                          |
| P3               | -35.20                       | -31.06                                    | -31.06                                                    | -31.06                                                                            | -31.08 (0.55)                                                                          |
| P4               | -7.66                        | -8.09                                     | -5.33                                                     | -5.33                                                                             | -5.26 (-1.69)                                                                          |
| P5               | -10.10                       | -4.89                                     | -5.46                                                     | -5.46                                                                             | -5.50 (0.71)                                                                           |
| P6               | -24.03                       | -19.26                                    | -23.85                                                    | -23.85                                                                            | -23.86 (0.05)                                                                          |
| P7               | -25.85                       | -20.90                                    | -25.16                                                    | -25.16                                                                            | -25.18 (0.17)                                                                          |
| P8               | -32.51                       | -28.68                                    | -28.99                                                    | -28.99                                                                            | -29.01 (0.17)                                                                          |

<sup>a</sup>Total energies including (ZPE) of isolated reactants R1, at M06-2X/6-311++G(d,p), BHandHLYP/6-311++G(d,p) and CCSD(T)/6-311++G(d,p)//BHandHLYP/6-311++G(d,p) levels of the theory, are -304.6722 (0.0699), -304.6431(0.0715) and -304.1866,( 0.0715) respectively. For R2, the corresponding values are -304.6765 (0.0707), -304.6469 (0.0721) and -304.1900 (0.0721) a.u., respectively and for R3, these are -381.0758 (0.0923), -381.0392 (0.0943) and -380.4735 (0.0943) a.u., respectively. (1 a.u.= 627.5095kcal/mol).

<sup>b</sup>Value of BSSE correction is given in the parenthesis,

<sup>c</sup>Single-point energy of TS6 could not be computed at the CCSD(T)/6-311++G(d,p)//BHandHLYP/6-311++G(d,p) level of the theory,

<sup>d</sup>Scale factor<sup>48</sup>

**Table S2.** Relative zero-point energy (ZPE) (in kcal/mol) of stationary points, relative to the ZPE of isolated reactants R1& R2 (i.e. *trans*- & *cis*-isomer without water)<sup>a</sup> and R3 (including a single-water molecule)<sup>a</sup> along various pathways depicted in Figures 2-6 (of the article), at the BHandHLYP/6-311++G(d,p) and M06-2X/6-311++G(d,p) levels of the theory, and relative energy<sup>b</sup> at the BHandHLYP/6-31G levels of the theory. The  $\langle S^2 \rangle$  values for open-shell systems are also given at the BHandHLYP/6-31G, BHandHLYP/6-311++G(d,p) and CCSD(T)/6311++G(d,p)//BHandHLYP/6-311++G(d,p) levels of theory.

| Species | ZPE                         |                              | $\Delta E/$ | $\langle S^2 \rangle$ |                     |                             |
|---------|-----------------------------|------------------------------|-------------|-----------------------|---------------------|-----------------------------|
|         | BHandHLYP/<br>6-311++G(d,p) | M06-2X<br>/6-311++G<br>(d,p) |             | BHandHLYP<br>/6-31G   | BHandHLYP<br>/6-31G | BHandHLYP/<br>6-311++G(d,p) |
| PRC1    | 1.57                        | 1.82                         | 7.84        | 0.7537                | 0.7530              | 0.7554                      |
| PRC2    | 1.19                        | 1.26                         | -5.42       | 0.7527                | 0.7555              | 0.7562                      |
| PRC3    | 1.88                        | 1.88                         | -7.72       | 0.7519                | 0.7532              | 0.7554                      |
| PRC4    | 1.88                        | 2.07                         | -7.23       | 0.7518                | 0.7530              | 0.7554                      |
| PRC5    | 1.95                        | 1.51                         | -9.04       | 0.7521                | 0.7537              | 0.7558                      |
| TS1     | -1.07                       | -0.06                        | 1.19        | 0.762                 | 0.7645              | 0.779                       |
| TS2     | 0.19                        | 0.50                         | -6.98       | 0.7626                | 0.7648              | 0.7718                      |
| TS3     | -1.19                       | -0.63                        | 2.25        | 0.7739                | 0.7733              | 0.7862                      |
| TS4     | -1.26                       | -0.50                        | 4.54        | 0.7706                | 0.7708              | 0.7897                      |
| TS5     | -1.69                       | -1.63                        | 1.69        | 0.7664                | 0.7674              | 0.7976                      |
| PC1     | 2.38                        | 2.57                         | -15.44      | 0.7546                | 0.7557              | 0.7631                      |
| PC2     | 2.45                        | 2.57                         | -20.41      | 0.7540                | 0.7554              | 0.7624                      |
| PC3     | 2.38                        | 2.45                         | -32.63      | 0.7910                | 0.7842              | 0.8577                      |
| PC4     | 2.64                        | 2.95                         | -32.58      | 0.7900                | 0.7846              | 0.8618                      |
| PC5     | 0.63                        | 1.44                         | -12.11      | 0.7533                | 0.7546              | 0.7587                      |
| BC6     | 1.57                        | 1.69                         | -6.15       | -                     | -                   | -                           |
| BC7     | 2.38                        | 2.32                         | -12.05      | -                     | -                   | -                           |
| BC8     | 2.07                        | 2.20                         | -8.03       | -                     | -                   | -                           |
| BC9     | 1.38                        | 1.57                         | -8.16       | -                     | -                   | -                           |
| BC10    | 1.51                        | 1.69                         | -6.84       | -                     | -                   | -                           |
| PRC6    | 4.64                        | 4.52                         | -23.59      | 0.7520                | 0.7532              | 0.7787                      |
| PRC7    | 4.39                        | 3.83                         | -22.40      | 0.7542                | 0.7531              | 0.7557                      |
| PRC8    | 4.39                        | 4.14                         | -22.40      | 0.7546                | 0.7530              | 0.7556                      |
| PRC9    | 3.89                        | 3.95                         | -22.21      | 0.7842                | 0.7531              | 0.7773                      |
| PRC10   | 3.77                        | 3.89                         | -20.65      | 0.7843                | 0.7531              | 0.7556                      |
| TS6     | 0.56                        | 0.63                         | -10.35      | 0.7673                | 0.7695              | -                           |
| TS7     | 2.82                        | 2.95                         | -13.11      | 0.7636                | 0.7629              | 0.7653                      |
| TS8     | 1.51                        | 2.26                         | -6.71       | 0.7719                | 0.7673              | 0.7837                      |
| TS9     | 1.88                        | 2.32                         | -11.42      | 0.7693                | 0.7665              | 0.799                       |
| TS10    | 1.00                        | 1.19                         | -10.35      | 0.7743                | 0.7688              | 0.8305                      |
| PC6     | 3.51                        | 3.26                         | -31.06      | 0.7535                | 0.7553              | 0.7594                      |
| PC7     | 4.77                        | 4.71                         | -33.01      | 0.7542                | 0.7556              | 0.7622                      |
| PC8     | 4.83                        | 4.77                         | -30.69      | 0.7548                | 0.7555              | 0.7622                      |
| PC9     | 4.20                        | 4.71                         | -46.50      | 0.7931                | 0.7800              | 0.8513                      |
| PC10    | 5.08                        | 5.40                         | -47.75      | 0.7845                | 0.7800              | 0.8518                      |

<sup>a</sup> The zero-point energy (ZPE) of R1, R2 and R3 at BHandHLYP/6-311++G(d,p) level of theory are 0.0715, 0.0721 and 0.0943 respectively. The respective values at M06-2X/6-311++G(d,p) are 0.0699, 0.0707 and 0.0923.

<sup>b</sup> Total energies including (ZPE) of isolated reactants R1, R2 and R3 at BHandHLYP/6-31G level of the theory, are -304.4249 (0.0713), -304.4277 (0.0718) and -380.7503 (0.0933) a.u., respectively. (1 a.u. = 627.5095 kcal/mol).

**Table S3.** Gibbs free-energy change ( $\Delta G$ ), in kcal/mol, along various pathways depicted in Figures 2–6 (of the article) at the DFT/BHandHLYP/6-311++G(d,p) level of the theory. The  $\Delta G$  between the pre-reactant complexes (PRCs) and the transition states (TSs) represents free-energy of activation:  $\Delta E_A = G_{TS} - G_{PRC}$ . The values in parentheses correspond to net Gibbs free-energy change along the respective pathway.

| Pathway    | $\Delta G$ or $\Delta E_A$ (in kcal/mol) |          |          |          |          |          |
|------------|------------------------------------------|----------|----------|----------|----------|----------|
|            | T (K)                                    | 10       | 100      | 200      | 298.15   | 500      |
| 1: R1-PRC1 |                                          | -3.39    | -1.51    | 1.13     | 3.83     | 7.29     |
| PRC1-TS1   |                                          | 3.51     | 3.64     | 3.89     | 4.08     | 4.52     |
| TS1-PC1    |                                          | -25.23   | -25.48   | -26.10   | -26.86   | -28.74   |
|            |                                          | (-25.11) | (-23.35) | (-21.08) | (-18.95) | (-16.93) |
| PRC1-PC1   |                                          | -21.71   | -21.84   | -22.21   | -22.78   | -24.22   |
| 2: R1-PRC2 |                                          | -3.01    | -1.32    | 0.82     | 2.82     | 6.65     |
| PRC2-TS2   |                                          | 3.07     | 3.58     | 4.52     | 5.71     | 8.47     |
| TS2-PC2    |                                          | -28.80   | -29.05   | -29.68   | -30.56   | -32.69   |
|            |                                          | (-28.74) | (-26.79) | (-24.34) | (-22.03) | (-17.57) |
| PRC2-PC2   |                                          | -25.67   | -25.48   | -25.16   | -24.85   | -24.22   |
| 3: R2-PRC3 |                                          | -4.52    | -2.51    | 0.31     | 3.14     | 9.10     |
| PRC3-TS3   |                                          | 6.65     | 6.71     | 6.67     | 6.59     | 6.34     |
| TS3-PC3    |                                          | -38.84   | -39.09   | -39.53   | -40.10   | -41.61   |
|            |                                          | (-36.71) | (-34.89) | (-32.55) | (-30.37) | (-26.17) |
| PRC3-PC3   |                                          | -32.19   | -32.38   | -32.86   | -33.51   | -35.27   |
| 4: R1-PRC4 |                                          | -3.39    | -1.57    | 0.82     | 3.20     | 7.97     |
| PRC4-TS4   |                                          | 6.84     | 7.09     | 7.66     | 8.28     | 9.60     |
| TS4-PC4    |                                          | -39.72   | -39.66   | -39.60   | -39.53   | -39.48   |
|            |                                          | (-36.27) | (-34.14) | (-31.12) | (-28.05) | (-21.91) |
| PRC4-PC4   |                                          | -32.88   | -32.57   | -31.94   | -31.25   | -29.88   |
| 5: R2-PRC5 |                                          | -1.32    | 0.69     | 3.33     | 3.33     | 11.04    |
| PRC5-TS5   |                                          | 10.60    | 10.86    | 11.44    | 12.30    | 13.87    |
| TS5-PC5    |                                          | -20.46   | -20.90   | -21.90   | -20.77   | -26.23   |
|            |                                          | (-11.24) | (-9.35)  | (-7.13)  | (-5.15)  | (-1.32)  |
| PRC5-PC5   |                                          | -9.85    | -10.04   | -10.46   | -11.04   | -12.36   |
| 6: R3-BC6  |                                          | -1.57    | 0.38     | 2.89     | 5.15     | 9.60     |
| BC6-PRC6   |                                          | -6.28    | -3.95    | -0.94    | -0.63    | 8.79     |
| PRC6-TS6   |                                          | 9.85     | 10.04    | 10.54    | 13.99    | 12.42    |
| TS6-PC6    |                                          | -23.75   | -23.97   | -24.54   | -25.29   | -27.05   |
|            |                                          | (-21.90) | (-17.5)  | (-12.05) | (-6.77)  | (3.76)   |
| PRC6-PC6   |                                          | -13.93   | -13.93   | -13.99   | -14.18   | -14.62   |

**Table 3 continued.....**

| Pathway     | $\Delta G$ or $\Delta E_A$ (kcal/mol) |          |          |          |          |          |
|-------------|---------------------------------------|----------|----------|----------|----------|----------|
|             | T (K)                                 | 10       | 100      | 200      | 298.15   | 500      |
| 7: R3-BC7   |                                       | -2.70    | -0.50    | 2.32     | 5.02     | 10.42    |
| BC7-PRC7    |                                       | -8.41    | -6.28    | -3.51    | -0.69    | 4.96     |
| PRC7-TS7    |                                       | 5.84     | 5.85     | 6.11     | 6.40     | 7.22     |
| TS7-PC7     |                                       | -28.30   | -28.44   | -28.83   | -29.42   | -30.94   |
|             |                                       | (-33.70) | (-29.37) | (-23.91) | (-18.69) | (-8.34)  |
| PRC7-PC7    |                                       | -22.46   | -22.59   | -22.72   | -23.02   | -23.72   |
| 8: R3-BC8   |                                       | -4.08    | -2.07    | 0.56     | 3.07     | 8.03     |
| BC8-PRC8    |                                       | -6.59    | -4.64    | -2.13    | -0.06    | 5.71     |
| PRC8-TS8    |                                       | 9.54     | 9.98     | 10.67    | 11.92    | 12.86    |
| TS8-PC8     |                                       | -30.75   | -31.00   | -31.50   | -32.19   | -33.76   |
|             |                                       | (-32.06) | (-27.73) | (-22.4)  | (-17.26) | (-7.16)  |
| PRC8-PC8    |                                       | -21.21   | -21.02   | -20.83   | -21.02   | -20.90   |
| 9: R3-BC9   |                                       | -3.14    | -1.26    | 0.94     | 2.95     | 6.84     |
| BC9-PRC9    |                                       | -3.45    | -1.51    | 1.26     | 1.69     | 9.66     |
| PRC9-TS9    |                                       | 3.20     | 3.77     | 4.71     | 8.16     | 8.35     |
| TS9-PC9     |                                       | -39.72   | -40.10   | -40.98   | -42.11   | -44.87   |
|             |                                       | (-43.29) | (-39.1)  | (-34.07) | (-29.3)  | (-20.02) |
| PRC9-PC9    |                                       | -36.58   | -36.33   | -36.27   | -36.27   | -36.52   |
| 10: R3-BC10 |                                       | -2.20    | -0.25    | 2.20     | 4.46     | 8.85     |
| BC10-PRC10  |                                       | -8.47    | -4.58    | -2.20    | -0.19    | 5.15     |
| PRC10-TS10  |                                       | 9.54     | 6.02     | 7.15     | 8.47     | 11.17    |
| TS10-PC10   |                                       | -30.75   | -39.72   | -39.97   | -40.41   | -41.48   |
|             |                                       | (-43.05) | (-38.53) | (-32.82) | (-27.30) | (-16.32) |
| PRC10-PC10  |                                       | -34.32   | -33.70   | -32.82   | -32.00   | -30.31   |

**Table S4.** Spin density distribution, in the atomic units of electronic charge ( $e$ ), determined from NBO analysis at each atomic centre of pre-reaction complexes and transition states involved in the hydrogen abstraction reaction of Glycoaldehyde with OH, in the presence and absence of a single-water molecule, at the BHandHLYP/6-311++G(d,p) level of theory.

| Species | C1      | H2      | H3      | C4      | H5      | O6      | O7      | H8      | O9                                                                                                                                                    | H10     | H11     | O12     | H13    |
|---------|---------|---------|---------|---------|---------|---------|---------|---------|-------------------------------------------------------------------------------------------------------------------------------------------------------|---------|---------|---------|--------|
| PRC1    | 0.0000  | 0.0000  | 0.0000  | -0.0010 | 0.0009  | -0.0008 | 0.0006  | -0.0001 | 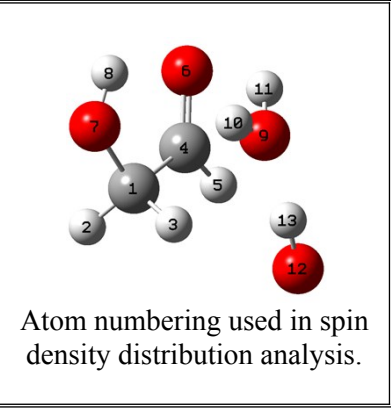 <p>Atom numbering used in spin density distribution analysis.</p> | -1.0240 | 0.0242  |         |        |
| TS1     | -0.0415 | -0.0022 | -0.0022 | -0.2126 | 0.0545  | -0.1127 | -0.0007 | -0.0001 |                                                                                                                                                       | -0.7009 | 0.0183  |         |        |
| PRC2    | -0.0040 | 0.0002  | -0.0009 | -0.0142 | 0.0074  | -0.0191 | -0.0030 | 0.0004  |                                                                                                                                                       | -0.9921 | 0.0253  |         |        |
| TS2     | -0.0411 | -0.0049 | -0.0003 | -0.1476 | 0.0379  | -0.1310 | -0.0045 | -0.0001 |                                                                                                                                                       | -0.7278 | 0.0194  |         |        |
| PRC3    | 0.0000  | 0.0000  | 0.0000  | 0.0000  | 0.0000  | 0.0000  | 0.0000  | 0.0000  |                                                                                                                                                       | -1.0246 | 0.0238  |         |        |
| TS3     | -0.2699 | 0.0659  | 0.0062  | 0.0311  | -0.0003 | -0.0664 | -0.0564 | 0.0008  |                                                                                                                                                       | -0.7303 | 0.0192  |         |        |
| PRC4    | -0.0022 | 0.0001  | 0.0014  | 0.0001  | -0.0001 | -0.0002 | -0.0005 | 0.0000  |                                                                                                                                                       | -1.0228 | 0.0241  |         |        |
| TS4     | -0.3312 | 0.0118  | 0.0675  | 0.0294  | -0.0096 | -0.0482 | -0.0578 | -0.0002 |                                                                                                                                                       | -0.6797 | 0.0179  |         |        |
| PRC5    | 0.0003  | 0.0001  | -0.0009 | 0.0008  | -0.0002 | -0.0032 | -0.0186 | 0.0073  |                                                                                                                                                       | -1.0097 | 0.0240  |         |        |
| TS5     | 0.0232  | -0.0013 | -0.0225 | -0.0019 | -0.0013 | -0.0099 | -0.4868 | 0.0689  |                                                                                                                                                       | -0.5848 | 0.0163  |         |        |
| PRC6    | 0.0000  | 0.0003  | 0.0001  | 0.0004  | 0.0000  | -0.0005 | -0.0161 | 0.0058  | 0.0008                                                                                                                                                | -0.0001 | 0.0000  | -1.0135 | 0.0228 |
| TS6     | 0.0197  | -0.0227 | -0.0035 | -0.0054 | -0.0002 | -0.0025 | -0.4642 | 0.0687  | 0.0004                                                                                                                                                | 0.0000  | 0.0000  | -0.6052 | 0.0149 |
| PRC7    | -0.0005 | 0.0000  | 0.0003  | 0.0006  | 0.0000  | 0.0000  | -0.0002 | 0.0000  | 0.0009                                                                                                                                                | 0.0001  | 0.0017  | -1.0267 | 0.0239 |
| TS7     | -0.0386 | -0.0027 | -0.0026 | -0.1121 | 0.0330  | -0.0957 | -0.0041 | -0.0001 | 0.0013                                                                                                                                                | 0.0002  | 0.0005  | -0.8003 | 0.0212 |
| PRC8    | -0.0074 | 0.0001  | 0.0043  | 0.0007  | 0.0000  | -0.0013 | -0.0004 | -0.0001 | 0.0007                                                                                                                                                | -0.0001 | 0.0000  | -1.0199 | 0.0233 |
| TS8     | -0.0381 | 0.0009  | 0.0023  | -0.2288 | 0.0534  | -0.1126 | -0.0128 | -0.0007 | 0.0002                                                                                                                                                | 0.0001  | 0.0000  | -0.6814 | 0.0176 |
| PRC9    | -0.0001 | 0.0000  | 0.0000  | 0.0000  | 0.0000  | 0.0000  | 0.0001  | 0.0000  | -0.0110                                                                                                                                               | 0.0046  | -0.0003 | -1.0170 | 0.0236 |
| TS9     | -0.2275 | 0.0043  | 0.0510  | 0.0362  | -0.0042 | -0.0577 | -0.0651 | 0.0005  | 0.0006                                                                                                                                                | 0.0004  | 0.0001  | -0.7588 | 0.0201 |
| PRC10   | -0.0072 | 0.0003  | 0.0042  | 0.0006  | -0.0002 | -0.0008 | -0.0011 | -0.0001 | 0.0008                                                                                                                                                | 0.0000  | 0.0000  | -1.0195 | 0.0232 |
| TS10    | -0.3170 | 0.0104  | 0.0756  | 0.0403  | -0.0034 | -0.0703 | -0.0556 | 0.0002  | 0.0006                                                                                                                                                | 0.0002  | 0.0000  | -0.6977 | 0.0167 |



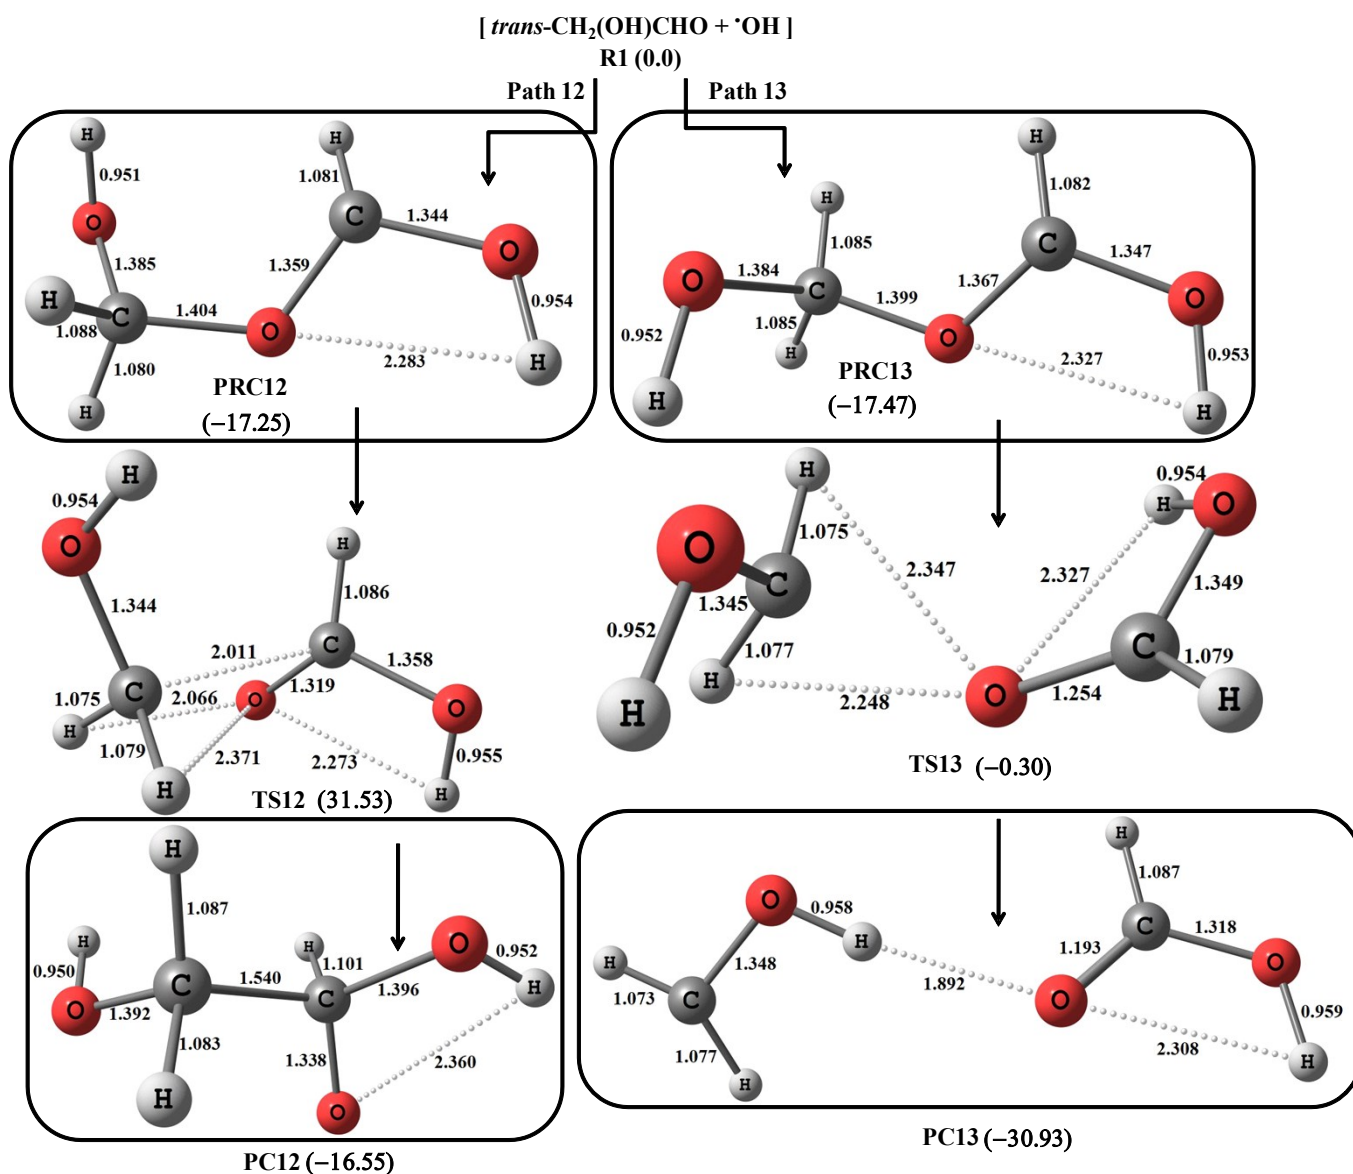

**Figure S2.** Addition pathways for the reaction of Glycolaldehyde with OH radical in the absence of water, Path 12: resulting in the formation of the oxy radical PC12; Path 13: leading to the formic acid and the hydroxyl methyl radical ( PC13). The geometries, with bond lengths depicted in angstroms, are optimized at the level of BHandHLYP/6-311++G(d,p) level of the theory. The numerical values, in parentheses, respectively represent the relative energy change, in kcal/mol, with respect to the isolated reactants R1, at BHandHLYP/6-311++G(d,p) level of the theory, Path 14: leading to the peroxy radical (PC15), and path 14 leading to the oxy radical species containing peroxy linkage (PC15).

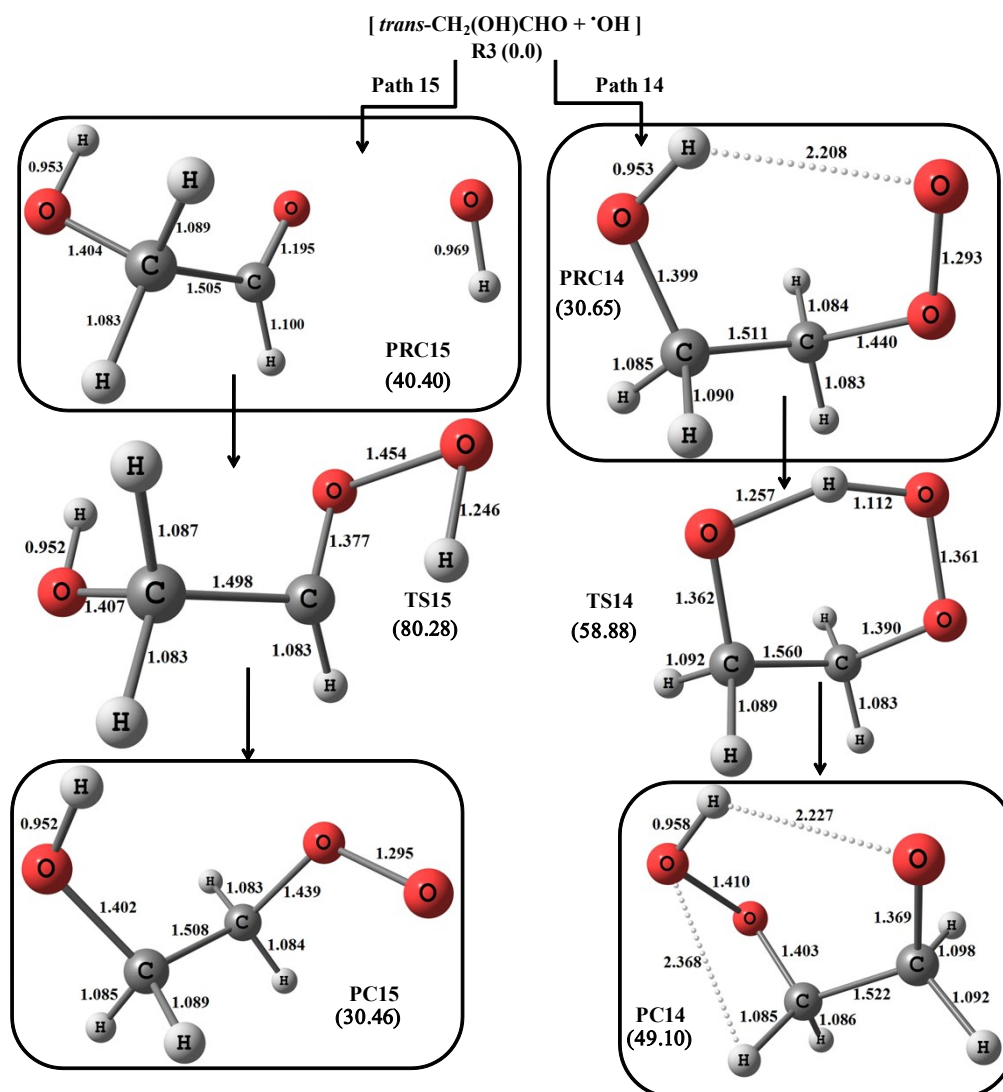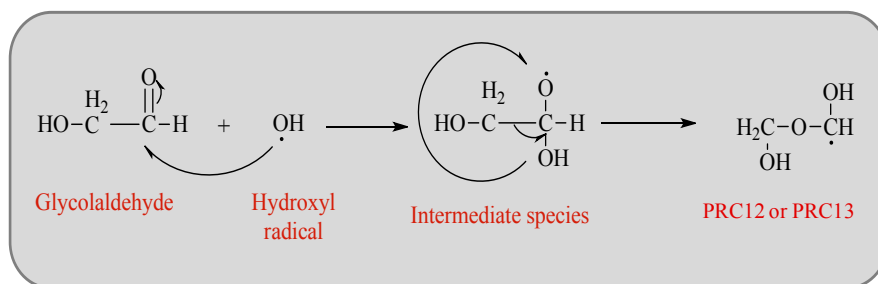

**Figure S3.** A schematic mechanism for the formation of species of type PRC12 or PRC13 by the reaction of Glycolaldehyde with hydroxyl radical via the oxy radical intermediate species.

**Table S5.** Calculated rate constants (in  $\text{cm}^3 \text{ molecule}^{-1} \text{ s}^{-1}$ ), without taking tunneling corrections into account for water-free pathway 2 in the temperature range 200K-500K at the CCSD(T)/6-311++G(d,p)//BHandHLYP/6-311++G(d,p) (BSSE uncorrected) level of the theory and comparison with  $k_{\text{lit}}$  reported in Ref. 12.

| Temperature(K) | $k_2$                  | $k_{\text{lit}}$       | Temperature(K) | $k_2$                  | $k_{\text{lit}}$       |
|----------------|------------------------|------------------------|----------------|------------------------|------------------------|
| 200            | $7.28 \times 10^{-11}$ | $2.56 \times 10^{-11}$ | 340            | $5.34 \times 10^{-12}$ | $2.12 \times 10^{-12}$ |
| 220            | $3.99 \times 10^{-11}$ | $1.47 \times 10^{-11}$ | 350            | $4.85 \times 10^{-12}$ | $1.92 \times 10^{-12}$ |
| 240            | $2.44 \times 10^{-11}$ | $9.24 \times 10^{-11}$ | 360            | $4.44 \times 10^{-12}$ | $1.76 \times 10^{-12}$ |
| 260            | $1.61 \times 10^{-11}$ | $6.25 \times 10^{-12}$ | 370            | $4.09 \times 10^{-12}$ | $1.60 \times 10^{-12}$ |
| 270            | $1.34 \times 10^{-11}$ | $5.26 \times 10^{-12}$ | 380            | $3.77 \times 10^{-12}$ | $1.49 \times 10^{-12}$ |
| 280            | $1.14 \times 10^{-11}$ | $4.48 \times 10^{-12}$ | 390            | $2.80 \times 10^{-12}$ | $1.38 \times 10^{-12}$ |
| 290            | $9.79 \times 10^{-12}$ | $3.87 \times 10^{-12}$ | 400            | $3.28 \times 10^{-12}$ | $1.28 \times 10^{-12}$ |
| 298.15         | $8.70 \times 10^{-12}$ | $3.46 \times 10^{-12}$ | 420            | $2.91 \times 10^{-12}$ | $1.12 \times 10^{-12}$ |
| 300            | $8.48 \times 10^{-12}$ | $3.37 \times 10^{-12}$ | 440            | $2.61 \times 10^{-12}$ | $1.00 \times 10^{-12}$ |
| 310            | $7.48 \times 10^{-12}$ | $2.97 \times 10^{-12}$ | 460            | $2.38 \times 10^{-12}$ | $9.01 \times 10^{-13}$ |
| 320            | $6.63 \times 10^{-12}$ | $2.64 \times 10^{-12}$ | 480            | $2.19 \times 10^{-12}$ | $8.19 \times 10^{-13}$ |
| 330            | $5.93 \times 10^{-12}$ | $2.35 \times 10^{-12}$ | 500            | $2.05 \times 10^{-12}$ | $7.51 \times 10^{-13}$ |

**Table S6.** Calculated rate constant (in  $\text{cm}^3 \text{ molecule}^{-1} \text{ s}^{-1}$ ), without taking tunneling corrections into account for water-free pathway 5 in the temperature range 200K-500K at the CCSD(T)/6-311++G(d,p)//BHandHLYP/6-311++G(d,p) (BSSE uncorrected) level of the theory and comparison with  $k_{\text{lit}}$  reported in Ref. 12.

| Temperature(K) | $k_5$                  | $k_{\text{lit}}$       | Temperature(K) | $k_5$                  | $k_{\text{lit}}$       |
|----------------|------------------------|------------------------|----------------|------------------------|------------------------|
| 200            | $3.84 \times 10^{-19}$ | $1.5 \times 10^{-18}$  | 340            | $7.27 \times 10^{-17}$ | $1.63 \times 10^{-16}$ |
| 220            | $1.19 \times 10^{-18}$ | $4.13 \times 10^{-18}$ | 350            | $9.08 \times 10^{-17}$ | $1.99 \times 10^{-16}$ |
| 240            | $3.09 \times 10^{-18}$ | $9.65 \times 10^{-18}$ | 360            | $1.12 \times 10^{-16}$ | $2.42 \times 10^{-16}$ |
| 260            | $6.96 \times 10^{-18}$ | $2.00 \times 10^{-17}$ | 370            | $1.39 \times 10^{-16}$ | $2.91 \times 10^{-16}$ |
| 270            | $1.01 \times 10^{-17}$ | $2.75 \times 10^{-17}$ | 380            | $1.68 \times 10^{-16}$ | $3.44 \times 10^{-16}$ |
| 280            | $1.40 \times 10^{-17}$ | $3.73 \times 10^{-17}$ | 390            | $2.03 \times 10^{-16}$ | $4.08 \times 10^{-16}$ |
| 290            | $1.93 \times 10^{-17}$ | $4.95 \times 10^{-17}$ | 400            | $2.41 \times 10^{-16}$ | $4.80 \times 10^{-16}$ |
| 298.15         | $2.47 \times 10^{-17}$ | $6.18 \times 10^{-17}$ | 420            | $3.37 \times 10^{-16}$ | $6.47 \times 10^{-16}$ |
| 300            | $2.60 \times 10^{-17}$ | $6.46 \times 10^{-17}$ | 440            | $4.58 \times 10^{-16}$ | $8.56 \times 10^{-16}$ |
| 310            | $3.43 \times 10^{-17}$ | $8.33 \times 10^{-17}$ | 460            | $6.08 \times 10^{-16}$ | $1.11 \times 10^{-15}$ |
| 320            | $4.48 \times 10^{-17}$ | $1.05 \times 10^{-16}$ | 480            | $1.68 \times 10^{-15}$ | $1.40 \times 10^{-15}$ |
| 330            | $5.75 \times 10^{-17}$ | $1.31 \times 10^{-16}$ | 500            | $2.26 \times 10^{-15}$ | $1.76 \times 10^{-15}$ |

**Table S7.** Enthalpy ( $\Delta H$ ) and entropy ( $\Delta S$ ) change in terms of  $\Delta H$  and  $-T\Delta S$  respectively, in kcal/mol, at temperature (T) 298K, at the BHandHLYP/6-311++G(d,p) level of the theory for various pathways obtained.

| Pathway    | $\Delta H$ | $-T\Delta S$ | Pathway | $\Delta H$ | $-T\Delta S$ |
|------------|------------|--------------|---------|------------|--------------|
| R1/PRC1    | -4.27      | 8.10         | PC1/P1  | 3.70       | -6.97        |
| R1/PRC2    | -3.07      | 5.89         | PC2/P1  | 7.34       | -7.58        |
| R2/PRC3    | -5.46      | 6.31         | PC3/P2  | 2.89       | -6.88        |
| R1/PRC4    | -4.39      | 7.40         | PC4/P3  | 6.15       | -9.22        |
| R2/PRC5    | -5.02      | 8.32         | PC5/P4  | 3.01       | -6.70        |
| R3/BC6+OH  | -1.69      | 6.80         | PC6/P5  | 17.95      | -17.04       |
| R3/BC7+OH  | -3.14      | 8.11         | PC7/P6  | 15.50      | -17.15       |
| R3/BC8+OH  | -4.52      | 7.54         | PC8/P7  | 11.74      | -15.97       |
| R3/BC9+OH  | -3.01      | 5.93         | PC9/P8  | 15.06      | -14.99       |
| R3/BC10+OH | -2.32      | 6.72         | PC10/P8 | 15.44      | -17.37       |

**Table S8.** Effect of basis set in the CCSD(T) calculations, employing cc-pVTZ and 6-311G(d,p) basis sets, for the relative energy of species explored along path 2, w.r.t the isolated reactants R1.

| Species | CCSD(T)/<br>cc-pVTZ//<br>BHandHLYP/<br>6-311++G(d,p)+ZPE | CCSD(T)/<br>6-311++G(d,p)//<br>BHandHLYP/<br>6-311++G(d,p)+ZPE | CCSD(T)/cc-pVTZ//<br>BHandHLYP/<br>6-311++G(d,p)+<br>ZPE+(BSSE) | CCSD(T)/<br>6311++G(d,p)//<br>BHandHLYP/<br>6-311++G(d,p)+ZPE<br>+(BSSE) |
|---------|----------------------------------------------------------|----------------------------------------------------------------|-----------------------------------------------------------------|--------------------------------------------------------------------------|
| PRC2    | -2.57                                                    | -2.32                                                          | -0.76(1.81)                                                     | -0.68(1.64)                                                              |
| TS2     | -3.78                                                    | -2.45                                                          | 1.70(5.47)                                                      | 2.30(4.74)                                                               |
| PC2     | -33.13                                                   | -33.63                                                         | -31.03(2.10)                                                    | -31.51(2.12)                                                             |

<sup>a</sup>Total energies including (ZPE) of isolated reactants R1, CCSD(T)/6-311++G(d,p)//BHandHLYP/6-311++G(d,p) and CCSD(T)/cc-pVTZ//BHandHLYP/6-311++G(d,p) levels of the theory, are -304.1866(0.0715) and -304.4107(0.0715) respectively.

**Table S9.** Rate constants (in  $\text{cm}^3 \text{ molecule}^{-1} \text{ s}^{-1}$ ) of water-free pathways for hydrogen abstraction in Glycolaldehyde with hydroxyl radical, in the temperature range 200-500K, at the CCSD(T)/6-311++G(d,p)//BHandHLYP/6-311++G(d,p) level of the theory. The subscript on the rate constant  $k$  depicts the respective pathway depicted in main text Figures 2, 3 and 4 (of the main article).

| T(K)   | $k_1$                  | $k_2$                  | $k_3$                  | $k_4$                  | $k_5$                  |
|--------|------------------------|------------------------|------------------------|------------------------|------------------------|
| 200    | $3.90 \times 10^{-8}$  | $1.27 \times 10^{-10}$ | $4.25 \times 10^{-11}$ | $1.17 \times 10^{-10}$ | $2.18 \times 10^{-12}$ |
| 220    | $1.07 \times 10^{-8}$  | $6.32 \times 10^{-11}$ | $2.03 \times 10^{-11}$ | $3.91 \times 10^{-11}$ | $6.39 \times 10^{-13}$ |
| 240    | $3.76 \times 10^{-9}$  | $3.58 \times 10^{-11}$ | $1.21 \times 10^{-11}$ | $1.71 \times 10^{-11}$ | $2.44 \times 10^{-13}$ |
| 260    | $1.59 \times 10^{-9}$  | $2.24 \times 10^{-11}$ | $8.37 \times 10^{-12}$ | $9.09 \times 10^{-12}$ | $1.14 \times 10^{-13}$ |
| 270    | $1.09 \times 10^{-9}$  | $1.82 \times 10^{-11}$ | $7.27 \times 10^{-12}$ | $7.06 \times 10^{-12}$ | $8.30 \times 10^{-14}$ |
| 280    | $7.81 \times 10^{-10}$ | $1.51 \times 10^{-11}$ | $6.41 \times 10^{-12}$ | $5.64 \times 10^{-12}$ | $6.22 \times 10^{-14}$ |
| 290    | $5.71 \times 10^{-10}$ | $1.27 \times 10^{-11}$ | $5.76 \times 10^{-12}$ | $4.64 \times 10^{-12}$ | $4.83 \times 10^{-14}$ |
| 298.15 | $4.59 \times 10^{-10}$ | $1.13 \times 10^{-11}$ | $5.44 \times 10^{-12}$ | $4.14 \times 10^{-12}$ | $4.07 \times 10^{-14}$ |
| 300    | $4.30 \times 10^{-10}$ | $1.08 \times 10^{-11}$ | $5.29 \times 10^{-12}$ | $3.92 \times 10^{-12}$ | $3.88 \times 10^{-14}$ |
| 310    | $3.31 \times 10^{-10}$ | $9.41 \times 10^{-12}$ | $4.88 \times 10^{-12}$ | $3.38 \times 10^{-12}$ | $3.18 \times 10^{-14}$ |
| 320    | $2.60 \times 10^{-10}$ | $8.22 \times 10^{-12}$ | $4.59 \times 10^{-12}$ | $2.97 \times 10^{-12}$ | $2.69 \times 10^{-14}$ |
| 330    | $2.08 \times 10^{-10}$ | $7.67 \times 10^{-12}$ | $4.33 \times 10^{-12}$ | $2.65 \times 10^{-12}$ | $2.31 \times 10^{-14}$ |
| 340    | $1.69 \times 10^{-10}$ | $6.46 \times 10^{-12}$ | $4.13 \times 10^{-12}$ | $2.40 \times 10^{-12}$ | $2.02 \times 10^{-14}$ |
| 350    | $1.41 \times 10^{-10}$ | $5.80 \times 10^{-12}$ | $3.95 \times 10^{-12}$ | $2.20 \times 10^{-12}$ | $1.80 \times 10^{-14}$ |
| 360    | $1.18 \times 10^{-10}$ | $5.26 \times 10^{-12}$ | $3.82 \times 10^{-12}$ | $2.04 \times 10^{-12}$ | $1.63 \times 10^{-14}$ |
| 370    | $1.00 \times 10^{-10}$ | $4.80 \times 10^{-12}$ | $3.73 \times 10^{-12}$ | $1.91 \times 10^{-12}$ | $1.51 \times 10^{-14}$ |
| 380    | $8.63 \times 10^{-11}$ | $4.39 \times 10^{-12}$ | $3.63 \times 10^{-12}$ | $1.81 \times 10^{-12}$ | $1.41 \times 10^{-14}$ |
| 390    | $7.53 \times 10^{-11}$ | $3.25 \times 10^{-12}$ | $3.57 \times 10^{-12}$ | $1.72 \times 10^{-12}$ | $1.32 \times 10^{-14}$ |
| 400    | $6.56 \times 10^{-11}$ | $3.76 \times 10^{-12}$ | $3.49 \times 10^{-12}$ | $1.64 \times 10^{-12}$ | $1.26 \times 10^{-14}$ |
| 420    | $5.21 \times 10^{-11}$ | $3.30 \times 10^{-12}$ | $3.42 \times 10^{-12}$ | $1.54 \times 10^{-12}$ | $1.17 \times 10^{-14}$ |
| 440    | $4.23 \times 10^{-11}$ | $2.93 \times 10^{-12}$ | $3.37 \times 10^{-12}$ | $1.46 \times 10^{-12}$ | $1.13 \times 10^{-14}$ |
| 460    | $3.55 \times 10^{-11}$ | $2.65 \times 10^{-12}$ | $3.36 \times 10^{-12}$ | $1.41 \times 10^{-12}$ | $1.12 \times 10^{-14}$ |
| 480    | $3.02 \times 10^{-11}$ | $2.41 \times 10^{-12}$ | $3.37 \times 10^{-12}$ | $1.37 \times 10^{-12}$ | $1.13 \times 10^{-14}$ |
| 500    | $2.65 \times 10^{-11}$ | $2.24 \times 10^{-12}$ | $3.42 \times 10^{-12}$ | $1.36 \times 10^{-12}$ | $1.16 \times 10^{-14}$ |

**Table S10.** Rate constants (in  $\text{cm}^3 \text{ molecule}^{-1} \text{ s}^{-1}$ ) of water-assisted pathways for the hydrogen abstraction in Glycolaldehyde with hydroxyl radical, in the temperature range 240-500K, at the CCSD(T)/-311++G(d,p)//BHandHLYP/6-311++G(d,p) (BSSE uncorrected) level of the theory. The subscript on the rate constant  $k$  depicts the respective pathway depicted in Figures 4-6 (of the main article).

| T(K)   | $[\text{H}_2\text{O}]^a$ | $k_6^b[\text{H}_2\text{O}]$ | $k_7[\text{H}_2\text{O}]$ | $k_8[\text{H}_2\text{O}]$ | $k_9[\text{H}_2\text{O}]$ | $k_{10}[\text{H}_2\text{O}]$ |
|--------|--------------------------|-----------------------------|---------------------------|---------------------------|---------------------------|------------------------------|
| 240    | $1.14 \times 10^{16}$    | $9.57 \times 10^{-19}$      | $1.29 \times 10^{-15}$    | $1.37 \times 10^{-14}$    | $2.28 \times 10^{-18}$    | $3.11 \times 10^{-16}$       |
| 280    | $2.56 \times 10^{17}$    | $1.23 \times 10^{-18}$      | $3.00 \times 10^{-15}$    | $8.85 \times 10^{-15}$    | $1.31 \times 10^{-17}$    | $5.12 \times 10^{-16}$       |
| 290    | $4.79 \times 10^{17}$    | $1.31 \times 10^{-18}$      | $3.53 \times 10^{-15}$    | $8.44 \times 10^{-15}$    | $1.86 \times 10^{-17}$    | $5.74 \times 10^{-16}$       |
| 298.15 | $7.69 \times 10^{17}$    | $1.41 \times 10^{-18}$      | $4.05 \times 10^{-15}$    | $8.30 \times 10^{-15}$    | $2.46 \times 10^{-17}$    | $6.36 \times 10^{-16}$       |
| 300    | $8.53 \times 10^{17}$    | $1.42 \times 10^{-18}$      | $4.13 \times 10^{-15}$    | $8.29 \times 10^{-15}$    | $2.60 \times 10^{-17}$    | $6.49 \times 10^{-16}$       |
| 310    | $1.45 \times 10^{18}$    | $1.54 \times 10^{-18}$      | $4.76 \times 10^{-15}$    | $8.19 \times 10^{-15}$    | $3.53 \times 10^{-17}$    | $7.25 \times 10^{-16}$       |
| 320    | $2.39 \times 10^{18}$    | $1.67 \times 10^{-18}$      | $5.41 \times 10^{-15}$    | $8.18 \times 10^{-15}$    | $4.69 \times 10^{-17}$    | $8.07 \times 10^{-16}$       |
| 330    | $3.78 \times 10^{18}$    | $1.81 \times 10^{-18}$      | $6.10 \times 10^{-15}$    | $8.25 \times 10^{-15}$    | $6.11 \times 10^{-17}$    | $8.98 \times 10^{-16}$       |
| 340    | $5.79 \times 10^{18}$    | $1.97 \times 10^{-18}$      | $6.83 \times 10^{-15}$    | $8.43 \times 10^{-15}$    | $7.87 \times 10^{-17}$    | $9.99 \times 10^{-16}$       |
| 350    | $8.62 \times 10^{18}$    | $2.16 \times 10^{-18}$      | $7.59 \times 10^{-15}$    | $8.62 \times 10^{-15}$    | $9.97 \times 10^{-17}$    | $1.11 \times 10^{-15}$       |
| 360    | $1.25 \times 10^{19}$    | $2.37 \times 10^{-18}$      | $8.36 \times 10^{-15}$    | $8.88 \times 10^{-15}$    | $1.24 \times 10^{-16}$    | $1.22 \times 10^{-15}$       |
| 370    | $1.77 \times 10^{19}$    | $2.61 \times 10^{-18}$      | $9.19 \times 10^{-15}$    | $9.25 \times 10^{-15}$    | $1.54 \times 10^{-16}$    | $1.36 \times 10^{-15}$       |
| 380    | $2.45 \times 10^{19}$    | $2.87 \times 10^{-18}$      | $1.00 \times 10^{-14}$    | $9.57 \times 10^{-15}$    | $1.87 \times 10^{-16}$    | $1.49 \times 10^{-15}$       |
| 390    | $3.33 \times 10^{19}$    | $3.20 \times 10^{-18}$      | $1.09 \times 10^{-14}$    | $9.99 \times 10^{-15}$    | $2.27 \times 10^{-16}$    | $1.64 \times 10^{-15}$       |
| 400    | $4.45 \times 10^{19}$    | $3.52 \times 10^{-18}$      | $1.17 \times 10^{-14}$    | $1.04 \times 10^{-14}$    | $2.69 \times 10^{-16}$    | $1.78 \times 10^{-15}$       |
| 420    | $7.54 \times 10^{19}$    | $4.35 \times 10^{-18}$      | $1.35 \times 10^{-14}$    | $1.13 \times 10^{-14}$    | $3.75 \times 10^{-16}$    | $2.12 \times 10^{-15}$       |
| 440    | $1.21 \times 10^{20}$    | $5.41 \times 10^{-18}$      | $1.55 \times 10^{-14}$    | $1.24 \times 10^{-14}$    | $5.06 \times 10^{-16}$    | $2.52 \times 10^{-15}$       |
| 460    | $1.84 \times 10^{20}$    | $6.80 \times 10^{-18}$      | $1.75 \times 10^{-14}$    | $1.37 \times 10^{-14}$    | $6.75 \times 10^{-16}$    | $2.96 \times 10^{-15}$       |
| 480    | $2.70 \times 10^{20}$    | $8.46 \times 10^{-18}$      | $1.97 \times 10^{-14}$    | $1.50 \times 10^{-14}$    | $8.72 \times 10^{-16}$    | $3.45 \times 10^{-15}$       |
| 500    | $3.82 \times 10^{20}$    | $1.07 \times 10^{-17}$      | $2.19 \times 10^{-14}$    | $1.66 \times 10^{-14}$    | $1.12 \times 10^{-15}$    | $4.04 \times 10^{-15}$       |

<sup>a</sup> water concentration values in molecules  $\text{cm}^{-3}$  at 100% relative humidity. Calculated using formula;  $c = p/RT$ ; c: concentration; p: vapour pressure in atm; R: universal gas constant & T is temperature in Kelvin.<sup>58,59</sup>

<sup>b</sup> The energy values used for calculating rate constant for path 6 are at the BHandHLYP/6-311++G(d,p) level of the theory since TS6 could not be refined at the CCSD(T) single-point level.

**Table S11.** Comparison of the rate constants (in  $\text{cm}^3 \text{molecule}^{-1} \text{s}^{-1}$ ), without tunneling correction, for water-free and water-assisted pathways for hydrogen abstraction in Glycolaldehyde with hydroxyl radical, at 298K, at the BHandHLYP/6-311++G(d,p), M06-2X/6-311++G(d,p) and CCSD(T)/-311++G(d,p)//BHandHLYP/6-311++G(d,p) (BSSE uncorrected) levels of the theory.

| Pathway                             | BH&HLYP/6-311++G(d,p)                    | M06-2X/6-311++G(d,p)                     | CCSD(T)/6-311++G(d,p)//<br>BHandHLYP/6-311++G(d,p) |
|-------------------------------------|------------------------------------------|------------------------------------------|----------------------------------------------------|
| 1                                   | $3.87 \times 10^{-13}$                   | $2.73 \times 10^{-11}$                   | $2.70 \times 10^{-11}$                             |
| 2                                   | $1.41 \times 10^{-13}$                   | $1.03 \times 10^{-10}$                   | $8.86 \times 10^{-12}$                             |
| 3                                   | $1.71 \times 10^{-14}$                   | $1.34 \times 10^{-12}$                   | $7.18 \times 10^{-13}$                             |
| 4                                   | $9.66 \times 10^{-16}$                   | $3.48 \times 10^{-13}$                   | $1.41 \times 10^{-13}$                             |
| 5                                   | $8.44 \times 10^{-19}$                   | $4.09 \times 10^{-14}$                   | $2.48 \times 10^{-17}$                             |
| <b>Overall<br/>(water-free)</b>     | <b><math>1.49 \times 10^{-13}</math></b> | <b><math>3.97 \times 10^{-12}</math></b> | <b><math>1.42 \times 10^{-12}</math></b>           |
| 6                                   | $2.04 \times 10^{-22}$                   | $4.04 \times 10^{-17}$                   | $2.04 \times 10^{-22}$                             |
| 7                                   | $1.08 \times 10^{-16}$                   | $3.42 \times 10^{-14}$                   | $3.76 \times 10^{-15}$                             |
| 8                                   | $9.49 \times 10^{-20}$                   | $1.98 \times 10^{-15}$                   | $4.37 \times 10^{-16}$                             |
| 9                                   | $6.16 \times 10^{-18}$                   | $1.23 \times 10^{-14}$                   | $9.56 \times 10^{-18}$                             |
| 10                                  | $4.06 \times 10^{-18}$                   | $8.28 \times 10^{-14}$                   | $2.13 \times 10^{-17}$                             |
| <b>Overall<br/>(water-assisted)</b> | <b><math>1.13 \times 10^{-16}</math></b> | <b><math>4.65 \times 10^{-14}</math></b> | <b><math>4.23 \times 10^{-15}</math></b>           |

**Table S12.** Relative energies and ZPE (in kcal/mol) of the stationary points obtained for the addition of hydroxyl radical to glycolaldehyde depicted in Figure S2 at the BHandHLYP/6-311++G(d,p) level of theory. The values are relative to the isolated reactants R1 depicted in Figure S2.

| Species | ZPE  | BHandHLYP/<br>6-311++G(d,p)+ZPE |
|---------|------|---------------------------------|
| PRC12   | 4.52 | -17.25                          |
| PRC 13  | 5.33 | -17.47                          |
| PRC 14  | 5.39 | 30.65                           |
| PRC 15  | 1.96 | 40.40                           |
| TS12    | 3.76 | 31.53                           |
| TS13    | 2.83 | -0.30                           |
| TS14    | 1.14 | 58.88                           |
| TS15    | 1.02 | 80.28                           |
| PC12    | 5.52 | -16.55                          |
| PC13    | 2.49 | -30.93                          |
| PC14    | 4.23 | 49.10                           |
| PC15    | 5.26 | 30.46                           |

**Optimized Cartesian Coordinates (X,Y,Z), in angstroms, for the pre-reactant complexes (PRCs), at the BHandHLYP/6-311++G(d,p) level of theory:**

**PRC1**

|   |             |             |             |
|---|-------------|-------------|-------------|
| C | 0.72944500  | 0.93689200  | 0.00482500  |
| H | -2.12001900 | -0.20323800 | 0.00000500  |
| H | 1.16872400  | 1.38340000  | 0.89460900  |
| C | 1.07679900  | -0.52968200 | -0.00426000 |
| H | -0.92192400 | 1.98481400  | -0.00216700 |
| O | 2.20018900  | -0.91981100 | 0.00155000  |
| O | -0.67374600 | 1.06728800  | -0.00544400 |
| H | 0.22023000  | -1.21878300 | -0.01676600 |
| O | -2.82234400 | -0.87083100 | 0.00284600  |
| H | 1.18273500  | 1.39737700  | -0.87068800 |

**PRC2**

|   |             |             |             |
|---|-------------|-------------|-------------|
| C | 0.73956061  | -0.90949436 | -0.45824334 |
| H | -0.32530301 | 0.93586202  | 0.12580711  |
| H | -0.31822072 | 1.42738493  | 2.61701754  |
| C | -0.32342765 | 0.15336120  | -0.64714146 |
| H | 1.21027245  | -1.10741230 | -1.41736657 |
| O | 1.73239872  | -0.51152049 | 0.43799281  |
| H | 0.23463304  | -1.82736640 | -0.14143523 |
| O | -0.31975152 | 0.52254258  | 2.29829402  |
| H | 1.34599636  | -0.38776906 | 1.30044722  |
| O | -1.11946489 | 0.15278504  | -1.53824592 |

**PRC3**

|   |             |             |             |
|---|-------------|-------------|-------------|
| C | 0.35739600  | -0.78484000 | -0.00024900 |
| H | 0.18040400  | -1.40717500 | -0.87771700 |
| H | 0.17965800  | -1.40711200 | 0.87710500  |
| C | 1.79707200  | -0.36656700 | 0.00031100  |
| H | 2.54095300  | -1.17236600 | 0.00074500  |
| O | 2.11603800  | 0.78342100  | 0.00025400  |
| O | -0.49235300 | 0.32016500  | -0.00063100 |
| H | 0.04566600  | 1.11294700  | -0.00071900 |
| O | -3.31351700 | 0.08937200  | 0.00040400  |
| H | -2.35482800 | 0.23848800  | -0.00000300 |

**PRC4**

|   |             |             |             |
|---|-------------|-------------|-------------|
| C | 0.88767800  | -0.42343100 | 0.32161800  |
| H | 0.90809900  | -0.50242900 | 1.40659800  |
| H | 0.18232100  | -1.16553300 | -0.04380400 |
| C | 0.38252200  | 0.95725700  | -0.00941700 |
| H | 1.16357300  | 1.69999400  | -0.22153200 |
| O | -0.77609800 | 1.25556000  | -0.02993600 |
| O | 2.19614600  | -0.62479100 | -0.13432600 |
| H | 2.18654800  | -0.91496400 | -1.03911200 |
| O | -2.65424700 | -0.91283000 | -0.07947300 |
| H | -2.18815200 | -0.06353700 | -0.02547700 |



**PRC5**

|   |             |             |             |
|---|-------------|-------------|-------------|
| C | -1.01970100 | 0.88942400  | 0.07343900  |
| H | 0.59429400  | -1.15486900 | 0.05131200  |
| H | -2.17971900 | -0.81262300 | -0.34550900 |
| C | -1.26272500 | -0.58539000 | 0.19430100  |
| H | 1.78990300  | 0.59054700  | -0.14011000 |
| O | 0.02418400  | 1.39435300  | -0.22224300 |
| O | 2.34747100  | -0.14009700 | 0.17402600  |
| H | -1.89025900 | 1.51681300  | 0.31402600  |
| O | -0.26338800 | -1.40438000 | -0.29429700 |
| H | -1.48579600 | -0.76308100 | 1.25395500  |

**PRC6**

|   |             |             |             |
|---|-------------|-------------|-------------|
| C | -1.31664400 | 0.00597800  | 0.65404700  |
| H | -1.80926300 | -1.14226000 | -1.16393400 |
| H | 1.67257200  | 1.13696100  | -0.15858800 |
| C | -1.05452900 | -1.06661700 | -0.37079000 |
| H | 3.10543300  | -0.86401000 | 0.30288000  |
| O | 1.13558600  | 1.90884000  | -0.42838000 |
| O | -1.64558700 | 1.20746800  | 0.02339500  |
| H | 1.58820500  | -1.13897000 | 0.20913900  |
| O | -0.09657600 | -1.78813500 | -0.37053300 |
| H | -2.17585000 | -0.30525800 | 1.24541700  |
| H | -0.45991300 | 0.09379100  | 1.31727800  |
| O | 2.24855300  | -0.45964500 | 0.37440800  |
| H | -0.82995100 | 1.63535700  | -0.24286000 |

**PRC7**

|   |             |             |             |
|---|-------------|-------------|-------------|
| C | -1.37176500 | -0.04928200 | 0.63120700  |
| H | 1.67915300  | 1.09330900  | -0.10399700 |
| H | -0.81659900 | 1.57364300  | -0.21779900 |
| C | -0.99146700 | -1.09534100 | -0.38328800 |
| H | -2.27723400 | -0.38540500 | 1.13321800  |
| O | 2.43919700  | -0.62534900 | 0.35264800  |
| O | 1.05332800  | 1.79445500  | -0.30481400 |
| H | -0.58238500 | 0.04282200  | 1.37381200  |
| O | -1.65623900 | 1.15581400  | -0.00972600 |
| H | -1.67771300 | -1.18450400 | -1.23471700 |
| H | 1.68403500  | -1.22661100 | 0.22044000  |
| O | -0.00861700 | -1.78059000 | -0.32086000 |
| H | 1.54877500  | 2.59984000  | -0.39645500 |

**PRC8**

|   |             |             |             |
|---|-------------|-------------|-------------|
| C | 0.72922300  | 0.24317900  | 0.70692700  |
| H | -2.51379900 | 0.72686600  | -0.25366600 |
| H | -1.41411300 | -1.27827700 | -0.04340800 |
| C | 1.98741600  | 0.64771500  | 0.00437400  |
| H | -2.87016100 | -1.79493800 | 0.02677600  |
| O | -2.32945600 | 1.68002700  | -0.16397800 |
| O | -2.32780000 | -1.07373800 | -0.26910900 |
| H | 1.05076800  | -1.41928800 | -0.19955400 |
| O | 2.57572000  | -0.10375500 | -0.71423700 |
| H | -0.06488600 | 0.94009200  | 0.44035300  |
| H | 0.89555700  | 0.33148400  | 1.78124800  |
| O | 0.36570400  | -1.06747500 | 0.37146500  |
| H | 2.34345500  | 1.66823200  | 0.18732700  |

**PRC9**

|   |             |             |             |
|---|-------------|-------------|-------------|
| C | -2.14323800 | 0.06096300  | -0.38459500 |
| H | -1.06499100 | 0.07588000  | 1.45145000  |
| H | 1.87229200  | -1.26218300 | -0.13985700 |
| C | -1.03804100 | -0.45867000 | 0.50473100  |
| H | 0.60126000  | 0.48976300  | -0.04228800 |
| O | -3.25495600 | 0.25080000  | -0.00273300 |
| O | 2.12857500  | 1.53509500  | 0.12246600  |
| H | -1.84784400 | 0.24338100  | -1.42968800 |
| O | 2.84672300  | -1.24799600 | -0.13791900 |
| H | 2.77100400  | 0.82980200  | 0.02818900  |
| H | -1.25020300 | -1.50363200 | 0.71400300  |
| O | 0.21663900  | -0.38922900 | -0.11405100 |
| H | 2.51031100  | 2.32387200  | -0.24471800 |

**PRC10**

|   |             |             |             |
|---|-------------|-------------|-------------|
| C | -1.12532000 | -1.03300200 | -0.24484800 |
| H | -0.95303400 | 0.31777600  | 1.36272400  |
| H | 3.14937400  | -1.23803300 | 0.22899300  |
| C | -1.19469700 | 0.36235400  | 0.29963200  |
| H | -2.51982500 | 1.78108100  | 0.22005800  |
| O | -0.13133700 | -1.70168200 | -0.23224200 |
| O | 1.83011200  | 1.96714700  | -0.32852700 |
| H | -2.06238600 | -1.41814500 | -0.66484600 |
| O | 2.41034200  | -0.64814000 | 0.31925300  |
| H | -0.42852900 | 0.96455300  | -0.18579800 |
| H | 1.60922200  | -1.15774200 | 0.16318900  |
| O | -2.49229600 | 0.84327700  | 0.07277600  |
| H | 2.19070800  | 1.08958000  | -0.10309400 |
